# Supplementary material for: Noninvasive intracranial pressure assessment using otoacoustic emissions: An application in glaucoma
Source: PLoS One. 2018 Oct 1;13(10):e0204939. doi: 10.1371/journal.pone.0204939 (PMC6166960; doi:10.1371/journal.pone.0204939)
Supplement: S1 Table — This is the underlying information for the current study. (XLSX) [file pone.0204939.s001.xlsx]

## Sheet: Sheet1
GroupType	SUB	Height	Gender	Age	BMI	Sys	Dia	p45_Test1	p30_Test1	p20_Test1	p10_Test1	p0_Test1	pNeg10_Test1	pNeg20_Test1	p45_Test2	p30_Test2	p20_Test2	p10_Test2	p0_Test2	pNeg10_Test2	pNeg20_Test2	FullShiftAvg
Healthy	Sub15	146	F	65	31	123	86	5.13	18.18	10.87	24.89	26.41	52.04	31.05	-28.77	-42.92	-29.41	-30.97	-7.03	-5.68	27.49	41.09
Healthy	Sub19	158	F	56	23.2	135	95	-22.04	-71.26	-82.42	-72.75	-89.37	-75.48	-81.45								-60.11
Healthy	Sub22	194	M	50	22.3	125	82	37.52	29.47	39.69	53.55	87.45	143.51	161.94	46.95	30.66	44.41	51.74	65.17	136.41	167.57	122.52
Healthy	Sub27	167	F	52	28.7	145	83	246.35	208.48	170.16	68.91	169.12	171.73	188.67	175.47	158.65	129.61	58.75	169.63	198.39	214.23	-9.46
Healthy	Sub31	186	M	51	27.5	130	80	78.2	79.41	86.23	92.71	103.17	123.84	157.47	48.54	53.21	58.63	65.31	69.88	110.02	164.15	97.44
Healthy	Sub35	163	F	61	30.9	132	86	-39.78	-44.45	-35.24	-44.36	-40.45	-47.91	-49.13	-50.87	-64.1	-54.18	-43.75	-51.83	-32.08	-47.17	-2.825
Healthy	Sub36	172	M	65	22	132	88	-32.89	-18.86	-29.67	-32.14	-33.08	-21.69	-16.58	-41.86	-24.92	-44.03	-41.31	-33.46	-23.44	-3.23	27.47
Healthy	Sub38	183	M	63	23.9	135	78								-13.73	-49.84	-15.44	24.13	96.07	45.03	30.81	44.54
Healthy	Sub40	175	M	67	25.8	115	74	65.32	74.94	103.08	115.71	126.96	109.62	145.83	114.27	132.63	92.65	124.54	126.96	137.45	162.95	64.595
Healthy	Sub42	173	F	62	27.4	151	87	-9.66	-13.39	-7.34	-5.46	11.17	3.79	-25.97	-4.4	-16.38	-8.6	-2.01	4.96	38.81	10.85	-0.53
Healthy	Sub43	176	F	50	22.6	131	78	116.69	101.66	105.96	97.04	134.87	189.31	255.83	98.07	102	88.42	109.36	134.53	207.09	248.84	144.955
Healthy	Sub44	178	M	67	23.4	119	71	13.74	11.48	11.32	9.87	10.08	21.93	38.6	15.56	8.77	11.68	9.39	18.99	47.63	42.34	25.82
Healthy	Sub45	176	F	57	23.2	132	95	163.64	152.51	193.94	181.64	207.67	227.15	233.25	171.23	153.94	163.84	207.59	189.06	227.53	166.19	32.285
Healthy	Sub50	189	M	62	26.3	138	89	-29.99	-84.89	-54.24	-18.35	12.27	66.92	107.98	-20.91	-29.45	-34.5	-23.25	-8.63	45.07	65.62	112.25
Healthy	Sub51	173	M	68	24.4	150	77	-168.35	-169.69	-165.82	-154.67	-144.6	-107.47	-93.9	-183.18	-177.04	-171.86	-163.14	-148.94	-107.54	-80.73	88.45
Healthy	Sub52	169	F	55	28.7	113	60	149.35	152.67	152.78	180.57	195.25	218.49	240.04	166.22	148.67	142.62	195.47	187.61	217.22	240.04	82.255
Healthy	Sub57	177	M	59	25.9	146	104	-164.38	-169.09	-171.53	-154.84	-163.15	-141.08	-117.44	-188.95	-190.66	-193.56	-165.49	-143.48	-126.53	-104.34	65.775
Healthy	Sub68	190	M	69	23	130	80	117.08	106.8	108.3	120.36	125.66	152.25	204.93	79.86	90.08	96.58	102.91	110.39	149.69	152.22	80.105
Healthy	Sub77	182	M	58	20.5	120	65	-177.31	-174.26	-160.66	-165.88	-139.89	-87.04	44.77	-110.76	-144.52	-82.96	-65.99	-60.79	8.38	14.38	173.61
Healthy	Sub79	173	F	55	26.7	119	76	-156.85	-150.83	-145.73	-124.58	-84.16	0.12	60.97	-117.08	-113.11	-113.83	-98	-74.25	-18.32	115.29	225.095
Healthy	Sub80	188	M	50	32.5	151	97	-91.33	-111.28	-108.15	-103	-87.35	-68.18	-36.18	-83.84	-84.29	-85.08	-77.58	-70.65	-50.56	-28.64	55.175
Healthy	Sub81	162	F	52	29.7	152	94	11.17	21.41	46.12	48.99	77.53	116.09	122.46	-14.47	-10.72	0.27	14.57	29.32	37.86	45.29	85.525
Healthy	Sub82	176	M	69	29.1	120	89	-136.34	-141.35	-143.71	-133.04	-100.82	-81.58	-49.51	-140.65	-141.31	-150.9	-134.64	-103.66	-53.44	-35.1	96.19
Healthy	Sub83	168	F	56	27.3	133	84	163.83	166.76	149.44	173.21	184.47	181.49	179.25	87.61	103.96	122.37	136.32	159.25	169.95	170.67	49.24
Healthy	Sub84	182	M	54	26.6	128	96	-105.29	-108.21	-109.72	-110.28	-98.76	-85.26	-68.93	-118.26	-111.95	-104.21	-98.56	-95.19	-82.88	-74.29	40.165
Healthy	Sub86	183	M	51	22.1	137	84	98.46	95.96	95.14	104.07	115.78	149.1	199.91	116.52	107.73	108.54	129.82	125.13	186.85	223.77	71.805
Healthy	Sub87	180	M	53	22.8	117	82	-93.74	-57.59	-31.57	-10.54	0.62	11.66	20.39								114.13
Healthy	Sub88	175	F	63	26.9	125	79	-180.96	-183.59	-157.59	-137.71	-100.39	-112.32	-78.57	-165.3	-173.52	-171.16	-174.4	-181.03	-100.22	-83.35	92.17
Healthy	Sub89	178	F	50	29	128	90	102.44	111.23	116.62	116.57	159.98	188.99	202.46	95.08	100.9	110.39	144.93	186.47	217.05	214.03	109.49
Healthy	Sub90	174	M	61	24.4	131	77	-168.24	-171.85	-169.56	-157.39	-132.43	-86.1	-44.45	-174.25	-166.88	-157	-174.67	-152.48	-102.82	-49.52	124.26
POAG	Sub1	176	M	66	20.7	141	91	-196.31	-167.106	-178.208	-176.5	-142.89	-122.12	-53.51	-174.35	-225.75	-232.52	-226.96	-139.56	-85.63	-67.44	124.855
POAG	Sub2	168	F	64	26.9	167	100	-66.79	-69.24	-70.63	-56.89	-53.98	-18.13	-14.31	-83.71	-82.53	-73.38	-66.92	-51.81	-31.19	-14.31	60.94
POAG	Sub3	170	M	60	24.6	130	85	148.03	147.99	152.77	158.58	172.29	207.4	231.01	149.3	153.13	155.43	162.82	171.9	206.88	244.29	88.985
POAG	Sub4	180	M	62	21.6	180	108	0.64	1.61	8.16	18.7	16.76	30.45	81.24	-18.24	-15.49	-4.93	12.65	23.45	46.8	85.11	91.975
POAG	Sub5	188	M	66	24.6	126	87	86.35	73.15	74.69	84.74	112.36	131.57	166.04	80.28	78.04	79.04	76.27	113.13	146.18	167.81	83.61
POAG	Sub6	188	M	61	24.9	156	94	64.15	60.39	69.85	65.35	87.47	101.49	135.52	56.71	58.19	35.47	39.37	55.13	91.81	142.44	78.55
POAG	Sub9	179	M	62	25.1	147	79	174.93	185.42	188.83	194.87	205.29	210.65	217.59	163.66	165.08	171.71	180.8	186.16	201.9	215.95	47.475
POAG	Sub11	186	M	54	23.1	147	92	-80.85	-98.79	-86.91	-95.06	-44.45	-3.1	75.94	-59.13	-54.82	-70.68	-74.15	-62.48	-28.67	7.36	111.64
POAG	Sub13	173	F	60	30.9	121	83	47.91	47.47	53.64	64.34	105.84	154.7	162.67	54.02	50.73	49.06	63.04	86.24	155.97	177.44	119.09
POAG	Sub16	186	M	63	24.3	137	80								38.47	65.35	75.58	75.68	97.5	118.05	151.34	112.87
POAG	Sub21	165	F	67	23.9	112	64	-119.34	-126.9	-137.96	-132.65	-118.86	-103.31	-95.82	-140.63	-152.09	-154.36	-152.22	-144.45	-111.42	-110.14	27.005
POAG	Sub26	162	F	66	28.6	150	85	-71.43	-76.36	-75.68	-91.48	-63.45	-20.41	6.42	-90.06	-95.26	-99.48	-116.44	-97.92	-67.4	-53.62	57.145
POAG	Sub28	160	F	57	32.4	110	79	-140.85	-163.05	-138.27	-134.68	-94.67	-88.94	-56.08	-146.57	-162.51	-176.37	-150.49	-149.79	-86.62	-56.08	87.63
POAG	Sub61	170	M	61	22.5	124	86	124.76	114.46	114.89	113.23	128.66	150.16	180.9	108.43	97.91	102.44	109.03	129.88	141.12	157.9	52.805
POAG	Sub62	176	M	66	23.2	135	94								40.94	50.02	52.06	41.05	70.69	94.48	98.07	57.13
POAG	Sub67	172	F	57	30.3	136	79	-30.76	-35.49	-10.63	-7.65	25.22	38.71	58.46	-52.51	-59.77	-54.31	-28.21	-1.84	33.53	66.14	103.935
POAG	Sub72	184	M	55	30.1	158	94	-12.39	-30.83	-35.58	-36.94	-35.22	-15.57	18.78	-75.91	-83.49	-81.51	-49.57	-54.86	-11.17	57.19	82.135
NTG	Sub14	167	F	58	23.7	118	77	-31.16	-42.61	-44.41	-20.95	12.74	37.98	35.53	-66.22	-32.09	-47.75	-35.93	-3.41	24.38	72.49	102.7
NTG	Sub17	176	M	66	23.9	120	75	90.71	81.04	71.43	54.64	42.95	48.25	56.54	33.99	29.63	21.79	27.94	42.87	45.36	47.82	-10.17
NTG	Sub20	177	F	61	17.6	137	78	-21.78	-31.36	-29.74	-18.78	-31.54	-33.42	4.68	-25.06	-28.08	-26.04	-28.31	-40.79	-12.77	18.54	35.03
NTG	Sub30	171	F	59	25.6	106	73	23.53	12.29	20.68	21.62	46.52	65.54	74.95								51.42
NTG	Sub37	181	F	70	23.2	142	103	123.65	155.63	165.79	189.29	186.58	185.72	189.71	135.21	158.15	150.31	160.39	158.61	147.35	158.07	44.46
NTG	Sub48	185	M	60	29.8	150	103	-22.79	-25.44	-22.57	-1.62	21.95	58.34	59.81	-55.31	-34.51	0.39	-3.87	13.87	68.68	62.45	100.18
NTG	Sub53	182	M	63	32.3	137	97	-22.65	-36.61	-45.34	-47.81	-47.89	-31.48	-11.29	-73.57	-66.36	-68.58	-69.15	-53.24	-28.27	-7.03	38.95
NTG	Sub55	160	F	60	29.1	122	81	113.34	102.1	100.51	113.67	130.72	160.99	176.76	95.02	94.33	106.26	101	136.95	157.09	197.75	83.075
NTG	Sub56	165	F	67	26.4	151	79	79.29	76.09	78.31	81.6	103.39	131.61		61.82	55.37	62.7	79.91	108.61	103.06
NTG	Sub58	176	F	62	20.7	144	76	-81.26	-89.69	-90.66	-92.23	-90.87	-76.57	-72.28	-76.35	-80.78	-88.19	-84.64	-85.33	-90.46	-69.18	8.075
NTG	Sub60	164	F	65	18.6	107	79	-20.26	-55.27	-83.79	-122.9	-40.75	68.85	123.69								143.95
NTG	Sub64	195	M	56	25	144	85	173.84	175.39	185.21	187.59	200.14	206.58	224.91	163.23	158.13	166.71	180.23	193.04	213.28	233.06	60.45
NTG	Sub66	187	M	53	25.7			-87.85	-77.94	-74.99	-59.19	-17.59	28.03	48.16	-152.95	-148.04	-124.38	-135.58	-112.46	-55.62	-10.35	134.41
NTG	Sub70	182	M	68	23.8	133	74	57.96	69.24	85.9	84.19	101.93	114.34	139.88								66.32
NTG	Sub73	171	F	64	26.7	124	85	-175.14	-174.55	-163.76	-165.1	-136.73	-102.49	-85.85	-176.22	-173.61	-167.71	-161.08	-140.19	-92.79	-68	98.755
